# Supplementary material for: Facile preparation of NiCo2O4@rGO composites for the removal of uranium ions from aqueous solutions
Source: Royal Society of Chemistry journal article supplement (doi:10.1039/c6dt03261c), 2016-01-01
Supplement: c6dt03261c1.pdf [file c6dt03261c1.pdf]

## Supporting Information

### Facile preraration of $\text{NiCo}_2\text{O}_4@\text{rGO}$ composites for the removal of uranium ions from aqueous solutions

**Xiumei Song,<sup>a,b</sup> Lichao Tan, <sup>\*a,b</sup> Xiaojun Sun,<sup>a</sup> Huiyuan Ma,<sup>a</sup> Lin Zhu,<sup>a</sup> Xiaoqing Yi,<sup>a</sup> Qiang Dong,<sup>a</sup> Junyu Gao,<sup>a</sup>**

<sup>a</sup> Key Laboratory of Green Chemical Engineering and Technology of College of Heilongjiang Province, College of Chemical and Environmental Engineering, Harbin University of Science and Technology, Harbin 150040, China. Fax: +86 451 8639 2712; Tel: +86 451 8639 2712; E-mail address: tanlcking@163.com

<sup>b</sup> Key Laboratory of Superlight Material and Surface Technology, Ministry of Education, Harbin Engineering University, Harbin 150001, China

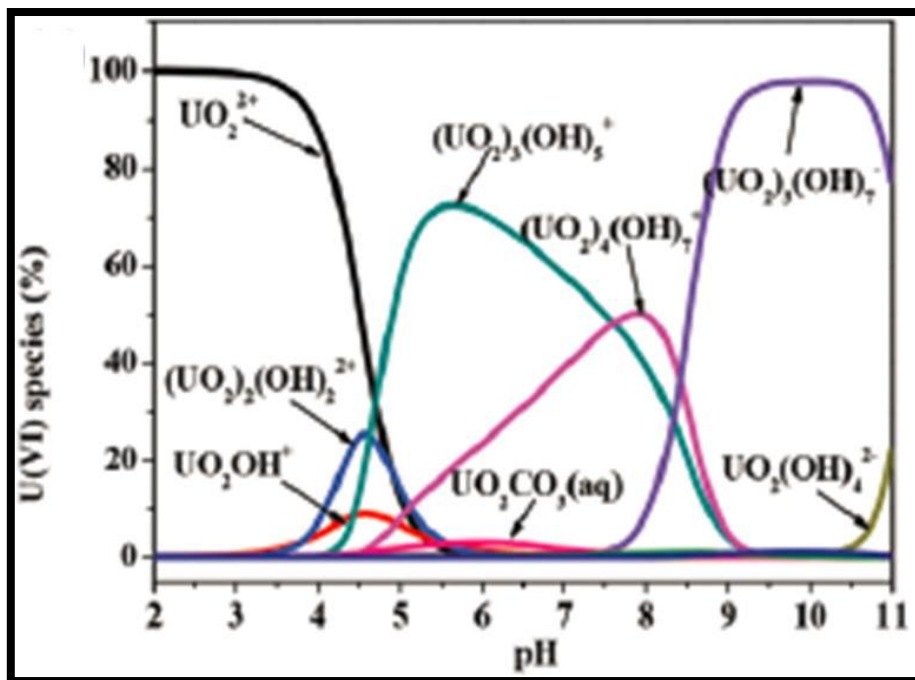

**Fig. S1** The relative distribution of Uranium (VI) species in solutions.

**Table S1. Comparison of uranium (VI) sorption capacity of NiCo<sub>2</sub>O<sub>4</sub>@rGO with other sorbents.**

| Sorbents                                         | $Q_{\max}$ (mg U/g) | Adsorbates         | Reference    |
|--------------------------------------------------|---------------------|--------------------|--------------|
| GO                                               | 97.5                | $\text{UO}_2^{2+}$ | [50]         |
| $\text{Fe}_3\text{O}_4/\text{GO}$                | 69.5                | $\text{UO}_2^{2+}$ | [51]         |
| $\text{CoFe}_2\text{O}_4/\text{rGO}$             | 125                 | $\text{UO}_2^{2+}$ | [52]         |
| $\text{Fe}_3\text{O}_4@\text{SiO}_2@\text{Ni-L}$ | 129.3               | $\text{UO}_2^{2+}$ | [53]         |
| $\text{Fe}_3\text{O}_4@\text{SiO}_2@\text{AO}$   | 105.5               | $\text{UO}_2^{2+}$ | [32]         |
| $\text{NiCo}_2\text{O}_4@\text{rGO}$             | 342.4               | $\text{UO}_2^{2+}$ | Present work |
